# Epidemiology of Patients Hospitalized for Ocular Trauma in the Chaoshan Region of China, 2001–2010

He Cao<sup>1</sup>, Liping Li<sup>1\*</sup>, Mingzhi Zhang<sup>2</sup>

**1** Injury Prevention Research Center, Medical College of Shantou University, Shantou, Guangdong Province, People's Republic of China, **2** Joint Shantou International Eye Centre, Shantou, Guangdong Province, People's Republic of China

## Abstract

**Background:** The burden and pattern of ocular trauma in China are poorly known and not well studied. We aimed at studying the epidemiological characteristics of patients hospitalized for ocular trauma at major ophthalmology departments in the largest industrial base of plastic toys in China.

**Methods:** A retrospective study of ocular trauma cases admitted to 3 tertiary hospitals in China from 1st January 2001 to 31st December 2010 was performed.

**Results:** The study included a total of 3,644 injured eyes from 3,559 patients over the 10-year period: 2,008 (55.1%) open-globe injuries, 1,580 (43.4%) closed-globe injuries, 41 (1.1%) chemical injuries, 15 (0.4%) thermal injuries and 678 (18.6%) ocular adnexal injuries. The mean age of the patients was  $29.0 \pm 16.8$  years with a male-to-female ratio of 5.2:1 ( $P=0.007$ ). The most frequent types of injury were work-related injuries (1,656, 46.5%) and home-related injuries (715, 20.1%). The majority of injuries in males (56.2%) and females (36.0%) occurred in the 15–44 age group and 0–14 age group, respectively. The final visual acuity correlated with the initial visual acuity (Spearman's correlation coefficient = 0.659;  $P < 0.001$ ). The Ocular Trauma Score also correlated with the final visual acuity (Spearman's correlation coefficient = 0.655;  $P < 0.001$ ).

**Conclusions:** This analysis provides an epidemiological study of patients who were hospitalized for ocular trauma. Preventive efforts are important for both work-related and home-related eye injuries.

**Citation:** Cao H, Li L, Zhang M (2012) Epidemiology of Patients Hospitalized for Ocular Trauma in the Chaoshan Region of China, 2001–2010. PLoS ONE 7(10): e48377. doi:10.1371/journal.pone.0048377

**Editor:** Andreas Wedrich, Medical University Graz, Austria

**Received:** April 10, 2012; **Accepted:** September 25, 2012; **Published:** October 31, 2012

**Copyright:** © 2012 Cao et al. This is an open-access article distributed under the terms of the Creative Commons Attribution License, which permits unrestricted use, distribution, and reproduction in any medium, provided the original author and source are credited.

**Funding:** The authors have no support or funding to report.

**Competing Interests:** The authors have declared that no competing interests exist.

\* E-mail: lpli@stu.edu.cn

## Introduction

Ocular trauma is a common cause of unilateral blindness [1] and is associated with significant emotional stress as well as numerous emergency room [2] and outpatient visits [3]. Worldwide, 55 million eye injuries restricting activities more than one day occur each year; there are approximately 1.6 million blind people from injuries, an additional 2.3 million people with bilateral low vision from this cause [4]. Each year, more than 2.5 million eye injuries occur in the United States, and 50,000 people permanently lose part or all of their vision [5,6]. The incidence of eye injuries may be higher in developing countries [7,8]. In addition, the rates at which eye injuries require hospitalization have ranged from 4.9 to 89 per 100,000 [5,9–16,25]. Despite the heterogeneity of the results, these studies provide important information regarding the burden of eye injuries.

Clinical and epidemiological ocular trauma studies have been described in the United States [5,9,12,13] and other developed countries [10,14,15,17–25]. Information on its epidemiology from developing countries is also available [7,26–30], but the burden and pattern of injuries in developing countries are poorly known and not well studied [31]. China still lacks complete eye injury statistics and authoritative epidemiological data.

The Chaoshan region is located in the eastern part of Guangdong Province, which is the largest industrial base for plastic toy production in China. This study included all hospitalized patients with ocular and orbital trauma in the Ophthalmology Departments of three major tertiary hospitals from 1st January 2001 to 31st December 2010. This study may help to identify contributing factors associated with highly industrialized environments and to find preventive methods for minimizing such disabling injuries. During the study period, the population was stable, and there were no significant changes in gender or age structure. Hence, these data may be representative of any of the surrounding coastal industrial regions.

## Methods

The research described herein adhered to the tenets of the Declaration of Helsinki. All medical records were anonymous and no patient information could be extracted except for research purposes. The informed written consent was given by the patients and the next of kin, caregivers or guardians on behalf of the minors/children participants involved in our study. The procedure was approved by the Ethics Committee of the Medical College, Shantou University, the Joint Shantou International Eye Center, the First Affiliated Hospital of Shantou

University and Shantou Center Hospital. The region of investigation included three cities and covered approximately 10346 square km. According to the National Statistical Yearbook 2010, the annual average population was 12,989,800 (95% confidence interval: 12,328,300–13,471,900) during the study period. The regional economic sectors include small-scale industries, agriculture, fishing, trade and tourism. The patients were classified into six age groups (0–14, 15–29, 30–44, 45–59, 60+ years) based on the criteria used in the China Injury Surveillance System and the National Statistical Yearbook. The Ophthalmology Departments of the three tertiary hospitals offer excellent eye care services and both emergency and specialized care to hospitalized patients of all ages with specific and complicated ocular or orbital diseases and houses a 24-hour Ophthalmic Emergency Department. This setup provided the opportunity to analyze ocular trauma in a well-defined study region. Ocular trauma was defined as any injury affecting the eye or adnexa that required hospital admission and had a principal or secondary discharge diagnosis from the International Classification of Diseases, Tenth Revision, Clinical Modification (ICD-10-CM). Completed records from 3559 patients were classified by the standardized international classification of ocular trauma (Birmingham Eye Trauma Terminology, BETT) [32,33]. The extracted patient data included age, gender, occupational categories, the place of residence, the date and cause of injury, the initial and final best-corrected (Snellen) visual acuity, the clinical diagnosis, the primary and secondary treatments, the duration of hospitalization and follow-up. We also utilized the Ocular Trauma Score (OTS) [32,34] to evaluate the final visual outcome. We classified the data into six groups based on the place where eye injuries occurred: work-related injuries, home-related injuries (falls or penetrating objects, toy bullets, struck against, etc.), school-related injuries (stationary learning, such as injuries due to pencils, knives, etc.), sport-related injuries, road traffic-related injuries, violence-related injuries, and other various outdoor activity-related injuries that cannot be classified into the former categories (such as injuries due to firecrackers, animal assaults, etc.). The initial visual reading was the best corrected Snellen visual acuity (BCVA) in the affected eye at the time of presentation. The final visual acuity was taken during the last follow-up visit (uniform duration of follow up: 1 year). Excluded from the analysis were 26 uncompleted case records and 42 cases that were admitted for treatment but were from outside regions.

### Statistical Analysis

The data were analyzed using SPSS version 17.0 (SPSS, Inc., Chicago, IL, US). Eye injury incidence rates were calculated for each year (2001–2010). Frequency distributions were created for injury types and causes. Statistical analyses of the quantitative data, including descriptive statistics and parametric and non-parametric comparisons, were performed for all variables. Frequency analyses were performed using Pearson's Chi-squared test. A one-way analysis of variance (ANOVA) was used to evaluate differences in parametric variables. Categorical evaluations were performed for the numeric scores representing the likelihood of the final visual acuity in the OTS study.

Correlation analyses (between the initial and final visual acuity and OTS and the final visual acuity) were performed using Spearman's test. All *P*-values reported are two sided, and a value less than 0.05 was considered statistically significant.

## Results

### Characteristics of Demographics and Diagnosis

This study included data from 3644 injured eyes from 3559 patients over a 10-year period. The age of the patients ranged from 2 months to 88 years with a mean and standard deviation of  $29.0 \pm 16.8$  years. Within the patient population, 2982 (83.8%) were males, and 577 (16.2%) were females ( $P = 0.007$ ; Pearson's Chi-squared test), yielding a male-to-female ratio of 5.2:1. The mean ages were  $31.0 \pm 16.2$  years for the males and  $18.5 \pm 15.7$  years for the females ( $P = 0.005$ ; ANOVA test). Most male patients (50.4%) in this study were blue collar workers (physical laborers) under 44 years old, whereas the females who presented ocular trauma (36.0%) were more likely to be children aged 14 years or younger. There was no significant difference in the frequency of right vs. left eye injuries (1904 right vs. 1740 left, 85 bilateral eye injuries). The incidence of open-globe injuries (2008 eyes, 55.1%) was higher than closed-globe injuries (1580 eyes, 43.4%). Six hundred seventy-eight patients (18.6%) had ocular adnexal injuries. Based on national population census data, the average annual hospitalization rate due to eye injuries for our health district was 27.7 per 100,000 (95% CI, 26.4–28.9) (Table 1).

### Injury Types Distributions by Age and Gender

The most frequent injury types among all cases were work-related injuries (46.5%), home-related injuries (20.1%), violence-related injuries (14.0%) and road traffic injuries (8.8%). There was a correlation between injury cause and gender ( $P = 0.001$ ; Pearson's Chi-squared test). The majority of injuries (56.2%) occurring in males were distributed in the 15–44 age group, for which the most frequent injury types were work-related injuries (70.0%), violence (16.3%), and road traffic injuries (6.2%). The majority of injuries (36.0%) occurring in females were distributed in the 0–14 age group, for which the most frequent injury types were home-related injuries (72.1%), violence (9.6%), and sports-related injuries (3.8%). Violence accounted for 14.0% of all injuries, 13.9% in males and 14.7% in females. The sources of injury were broad and varied (Figure 1).

### Causative Agents Resulting in Eye Injuries

There was a wide variety of causative agents that resulted in eye injuries (Table 2). The agent of injury was primarily work related (46.5%), including metal fragments/nails (883, 53.3%), wire/steel (333, 20.1%) and stone (252, 15.2%). For home-related injuries, knives/scissors were the leading agents of eye injuries (506, 70.8%), while fingers/fists were the main agents (191, 38.2%) for cases of violence-related injuries. Eye protection was present for only two patients (one was a metal welder, and the other was a victim of violence) (Table 2).

### Presentation Interval and Injury Time

We also evaluated the time interval from the point of injury to arrival at the clinic: 2293 patients (64.4%) arrived in the emergency room in less than 6 hours, 732 (20.6%) within 6 to 12 hours after injury, 195 (5.5%) within 12 to 24 hours after injury, and 339 (9.5%) arrived more than 1 day after the injury. Therefore, 9.5% of patients took more than 24 hours to seek medical care after their injury (3.6% were workers, and 5.9% were children). There was a significant difference in the final visual acuity between the patients who arrived in the emergency room within 24 hours and those who arrived more than 24 hours after the injury ( $P < 0.01$ ; Pearson's Chi-squared test). A presentation interval with 24 hours or longer after injury means a worse prognosis. The eye injuries occurred throughout the day and

**Table 1.** Characteristics of patients hospitalized with eye injury diagnoses over a 10-year period (1st January 2001–31st December 2010).

|                                                      |                 |
|------------------------------------------------------|-----------------|
| Total eye injuries                                   | 3644            |
| Total patients                                       | 3559            |
| Annual hospitalized injuries incidence (per 100,000) | 27.7            |
| Right/left eye                                       | 1904/1740       |
| Open/closed globe                                    | 2008/1580       |
| Male/female                                          | 2982/577        |
| Age (years, Mean $\pm$ SD <sup>a</sup> )             |                 |
| Total                                                | 29.0 $\pm$ 16.8 |
| Male                                                 | 31.0 $\pm$ 16.2 |
| Female                                               | 18.5 $\pm$ 15.7 |
| Mean duration of hospitalization (days)              | 8.4 $\pm$ 10.3  |
| Mean duration of follow up (months)                  | 12.6 $\pm$ 1.5  |
| Diagnosis                                            | ICD-10-AM Code  |
| Open-globe injuries                                  | 2008            |
| Penetrating                                          | 1823            |
| IOFB <sup>b</sup>                                    | 509             |
| Perforating                                          | 12              |
| Rupture                                              | 272             |
| Closed-globe injuries                                | 1580            |
| Contusion of the eye and adnexa                      | 1573            |
| Lamellar laceration                                  | 7               |
| Chemical burn confined to the eye and adnexa         | 41              |
| Thermal burn confined to the eye and adnexa          | 15              |
| Adnexa injuries of globe                             | 678             |
| Orbital wall fractures                               | 76              |
| Lacrimal apparatus injury                            | 371             |
| Eyelid injury                                        | 194             |
| Injury to the ocular motor nerves                    | 27              |
| Conjunctiva injury                                   | 10              |

ICD-10-AM Code = International Classification of Diseases, Tenth Revision.

SD<sup>a</sup>: Standard Deviation.

IOFB<sup>b</sup> = Intraocular Foreign Body.

doi:10.1371/journal.pone.0048377.t001

night, with most work-related injuries in males occurring from 16:00 to 17:00 (188 cases, 12.3%) and most home-related injuries in females from 21:00 to 22:00 (40 cases, 16.4%). There was no significant variation in the day of the year or the season in which the injuries occurred (Figure 2).

## Management

A total of 809 (22.2%) patients were managed conservatively on medications, and the remaining 2835 (77.8%) required additional procedures. Ocular wall repair (1349, 37.0%) and lens extraction (567, 15.6%) were the most commonly required additional procedures. Eighty-five (2.3%) eyes exhibited anterior chamber washout following severe hyphema and anterior chamber foreign bodies. Posterior vitrectomies were required for 266 (7.3%) eyes with intravitreal foreign bodies (86 eyes), vitreous hemorrhages (64 eyes), retinal detachments (60 eyes) and endophthalmitis (56 eyes). Despite optimal follow-up, the functional results after combined anterior and posterior segment injuries were discouraging: only 19.2% of the eyes attained a BCVA of 0.3 or better after primary

wound closure and secondary surgery for reconstruction. However, 31.8% of eyes with injuries limited to the anterior segment achieved a BCVA of 0.3 or better ( $P < 0.01$ , Pearson's Chi-squared test). In 52 (1.4%) no light perception (NLP) eyes, enucleation was carried out for globe rupturing and uncontrolled endophthalmitis. In addition, 371 (10.3%) eyes with a canalicular fracture received anastomosis, and 56 (1.5%) orbital fracture repairs were performed due to significant enophthalmos and persistent diplopia (Table 3).

## Correlation between Visual Outcome and OTS

There was a significant difference in final visual acuity between open- and closed-globe injuries ( $P < 0.001$ ; Pearson's Chi-squared test). The closed-globe injuries appeared to have a better prognosis because 1282 (71.2%) open-globe injured eyes had the final visual acuity lower than 0.3, while 947 (67.6%) closed-globe injured eyes had the final visual acuity equal to or better than 0.3. A comparison of the final visual acuity and the presenting visual acuity is shown in Table 4. The final visual acuity was 20/40 or better in 1092 eyes (30.0%), 20/100–20/50 in 550 eyes (15.1%), and 20/100 or less in 1354 eyes (37.2%). Two hundred fifty-six eyes (7%) had a final visual acuity of no light perception, and 3219 eyes with an initial visual acuity number were classified in OTS categories 1 through 5. Those patients with no light perception for their initial acuity had a poor prognosis. The initial visual acuity correlated with the final visual acuity (Spearman's correlation coefficient = 0.658;  $P < 0.001$ ). The OTS also correlated with the final visual acuity (Spearman's correlation coefficient = 0.655;  $P < 0.001$ ) (Table 5).

## Discussion

Estimates of the rate of eye injury are highly dependent on the definition and the source of data [35]. Hospital discharge data provide a useful source of such information. To our knowledge, this is the most current study that has examined the epidemiology of hospitalized eye injuries over a 10-year period in China. Our findings indicate that ocular trauma is a significant cause of visual loss in this population. Preventive efforts are important for both work-related and home-related eye injuries.

## Characteristics of Demographics and Diagnoses

This study estimates that the annual incidence rate of hospitalized eye injury is 27.7 per 100,000. This rate is higher than that reported by Pamela L Owens et al. in the United States in 2011 (6.5 per 100,000) [35], Ayman Saeed et al. in Ireland in 2010 (18.0 per 100,000) [14], Chua D et al. in Singapore in 2011 (12.6 per 100,000) [36], Salvatore Cillino in Italy in 2008 (4.9 per 100,000) [25], and less than Raymond S et al. in Australia in 2010 (53.3 per 100,000) [10]. A bias of underestimating the true incidence of ocular trauma may have occurred due to the loss of many of the minor trauma cases who may have sought care for eye injuries in other hospitals out of this region and of cases of polytraumatized patients. The risk to the large local population base cannot be accurately determined, which is a limitation of this study. This result reflected the higher incidence rate of hospitalized eye injuries and disease burden in our study region. The incidence of open-globe injuries was higher than closed-globe injuries. This finding differs from the result reported by Ojabo CO in Nigeria [37] and Pandita A in New Zealand [38], who reported that closed-globe injuries were more common than open-globe injuries. These discrepancies could likely be attributed to the higher proportion of occupational injuries from sharp, or penetrating injuries. The patients in this study did not use proper eye

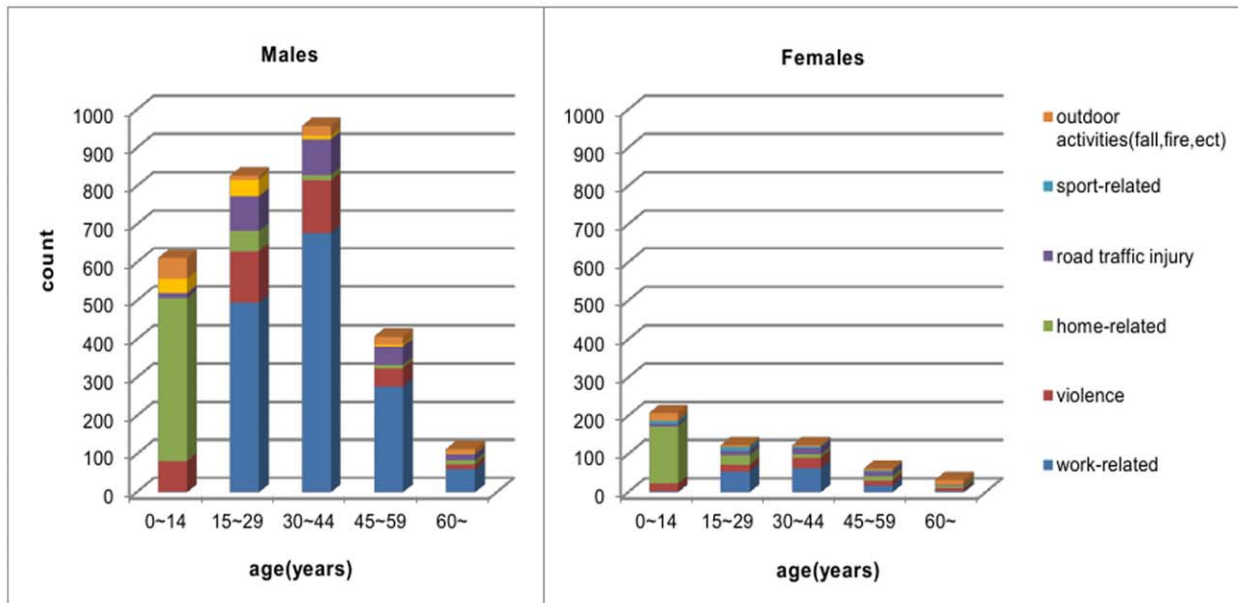

**Figure 1. Frequency of types of eye injuries by age and gender.** The majority of injuries (56.2%) occurring in males were distributed in the 15–44 age groups; the most frequent injury cause were related to work (70.0%), violence (16.3%), and road traffic (6.2%). The majority of injuries (36.0%) occurring in females were distributed in the 0–14 age group; the most frequent injury cause were related to the home (72.1%), violence (9.6%), and sports (3.8%).

doi:10.1371/journal.pone.0048377.g001

**Table 2. Causative agents of the most frequent injury categories by gender.**

| Inciting agent               | Male (%)    | Female (%) | Total (%)   |
|------------------------------|-------------|------------|-------------|
| <b>Work related</b>          | 1513 (50.7) | 143 (24.8) | 1656 (46.5) |
| Metal fragments/nails        | 829         | 54         | 883         |
| Wire/steel                   | 302         | 31         | 333         |
| Stone                        | 226         | 26         | 252         |
| Grinding wheel               | 91          | 19         | 110         |
| Chemical burn                | 40          | 1          | 41          |
| Thermal burn                 | 13          | 2          | 15          |
| Woody debris                 | 12          | 10         | 22          |
| <b>Home related</b>          | 512 (17.2)  | 203 (35.2) | 715 (20.1)  |
| Knives/scissors              | 355         | 151        | 506         |
| Toys bullets                 | 114         | 21         | 135         |
| Hammer                       | 27          | 19         | 46          |
| Fall                         | 16          | 12         | 28          |
| <b>Violence</b>              | 415 (13.9)  | 85 (14.7)  | 500 (14.0)  |
| Finger/fist                  | 166         | 25         | 191         |
| Gun shot                     | 78          | 11         | 89          |
| Sticks/twigs                 | 68          | 49         | 117         |
| Glass bottle                 | 66          | 0          | 66          |
| Knives/scissors              | 37          | 0          | 37          |
| <b>Road traffic injuries</b> | 262 (8.8)   | 50 (8.7)   | 312 (8.8)   |
| Motorcycle                   | 226         | 36         | 262         |
| Vehicle                      | 36          | 14         | 50          |
| <b>Total</b>                 | 2702 (90.6) | 481 (83.4) | 3183 (89.4) |

doi:10.1371/journal.pone.0048377.t002

protection when conducting hazardous tasks. Further research to better understand the poor compliance with protective eyewear regulations is recommended.

### Injury Types Distributions by Age and Gender

Age and gender were found to correlate with the susceptibility to ocular trauma. However, the mean age for ocular injury in this study was 29.0 years, which corresponds to most other studies in which a mean age of approximately 30 years has been reported [39–45]. This is likely due to the work-related injuries that contributed to the largest portion of injuries (46.5%). The percentage of children aged 14 years or less was 21.1 (95% CI 18.9–23.4) during the study period based on the National Statistical Yearbook 2010. Due to the prosperity of the local plastic toy industry, there are many household toy manufacturing plants. In this study, children often assisted in toy production, and they might have worked and played with toys of substandard quality, resulting in a significantly larger pediatric portion in our study population (23.6%) compared to other studies [41,44]. These two types of patients are mostly exposed to sharp instruments: workers with machines and rough instruments and children with various sharp instruments and toys at home or in school. Similar to other studies [41–43], males constituted 83.8% of the patients, with a male-to-female ratio of 5.1 to 1.

### Causative Agents Resulting in Eye Injuries

Metal fragments/nails remain the leading (883, 53.3%) agents that cause eye injury among all work-related injuries according to previous reports in the literature [44–48]. The local work tasks include grinding, welding, hammering, drilling, carpentry, metal cutting and nailing. These activities commonly involve high-powered tools that generate metal fragments/nails at high velocities and often have devastating effects on the eye. It is recognized that males have a relatively higher tendency for work-related, violence-related and road traffic-related eye injuries.

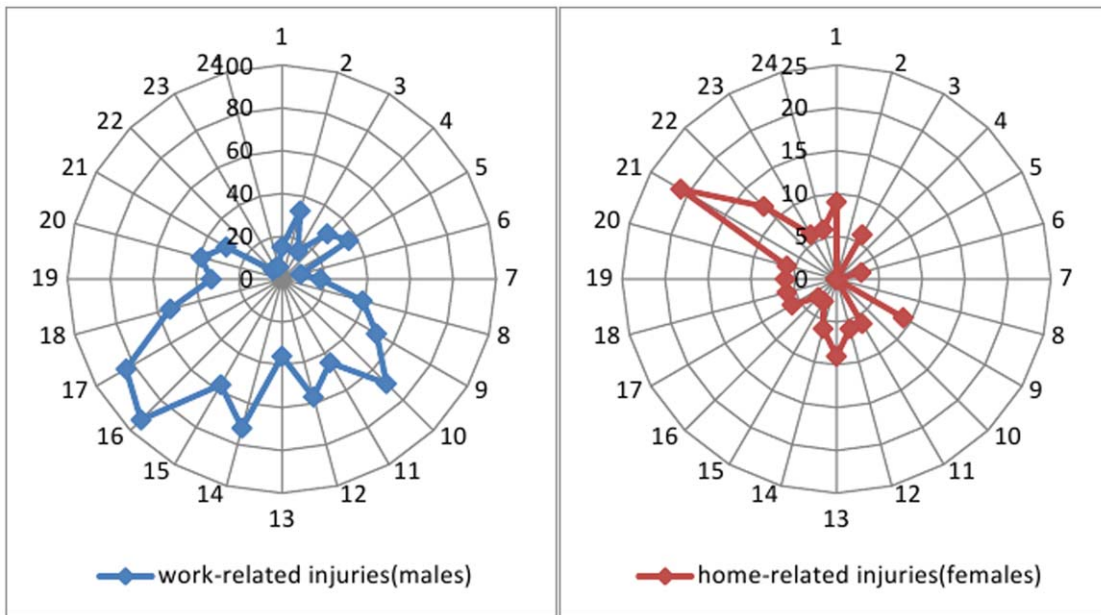

**Figure 2. Incidence times of work-related and home-related eye injuries in males and females, respectively, plotted over a one-day period.** Work-related eye injuries in males were spread throughout the day and night, with most injuries occurring during 16:00–17:00 (12.3%); home-related injuries in females primarily occurred during 21:00–22:00 (16.4%). The radial numbers are a count of patients for the entire 10-year period and the circumferential numbers are the hours of the day. doi:10.1371/journal.pone.0048377.g002

Among transportation-related injuries, motorcycle accidents are one of the highest risks for eye injuries. A large-scale prospective study of violence-related eye injuries is needed.

**Presentation Interval and Injury Time**

The current study has shown that work-related eye injuries occur during multiple daily peaks in males, with most injuries occurring near the end of the day (16:00–17:00); night operation was also a risk factor. This finding differs from the study performed by Justin M et al. in the United States in 2010 [47], which showed a double peak during the course of a day. These injury times

correlate with regular daily activity. Other contributing factors include worker fatigue and overtime, which were also reported to increase the risk of occupational eye injuries by Blackburn J et al. [48]. Workers could benefit from better training to recognize fatigue and strategies to prevent fatigue from impacting their work, especially while completing hazardous tasks in the afternoon. Another explanation may be the workflow at job sites; more hazardous work may be undertaken at these times. More research is needed to better understand the significance of these time-related circumstances with respect to eye injuries. Additionally,

**Table 3. Non-surgical and surgical management reports from initial presentation to final follow up in eye injury cases.**

| Management               | Frequency | Percentage (%) |
|--------------------------|-----------|----------------|
| Non-surgical             | 809       | 22.2           |
| Surgical                 | 2835      | 77.8           |
| Ocular wall repair       | 1349      | 37.0           |
| Lens extraction          | 567       | 15.6           |
| Posterior vitrectomy     | 266       | 7.3            |
| Anterior chamber washout | 85        | 2.3            |
| Scleral Buckle           | 49        | 1.3            |
| Keratoplasty             | 0         | 0              |
| Enucleation              | 52        | 1.4            |
| Glaucoma surgery         | 40        | 1.1            |
| Canalicular anastomosis  | 371       | 10.3           |
| Orbital fracture repair  | 56        | 1.5            |
| Total                    | 3644      | 100            |

doi:10.1371/journal.pone.0048377.t003

**Table 4. A comparison of final visual acuity and presenting visual acuity.**

| Visual acuity | At presentation  |                | At last follow up |                |
|---------------|------------------|----------------|-------------------|----------------|
|               | Frequency        | Percentage (%) | Frequency         | Percentage (%) |
| NLP           | 236              | 6.5            | 256               | 7.0            |
| 4/200-LP      | 1645             | 45.1           | 899               | 24.7           |
| 19/100–5/200  | 421              | 11.6           | 455               | 12.5           |
| 20/50–20/100  | 371              | 10.2           | 550               | 15.1           |
| ≥20/40        | 546              | 15.0           | 1092              | 30.0           |
| Others        | 425 <sup>a</sup> | 11.6           | 392 <sup>b</sup>  | 10.7           |
| Total         | 3644             | 100            | 3644              | 100            |

(Spearman’s correlation coefficient = 0.659,  $P < 0.001$ ).  
 425<sup>a</sup>: includes the patients who were too young to receive the visual acuity examination and those with presenting symptoms that were too serious to apply to the visual acuity examination.  
 392<sup>b</sup>: includes the patients who were too young to receive the visual acuity examination, those transferred to another health care facility, receiving home health care, not adhering to medical advice or with missing/unrecorded data, and death.

doi:10.1371/journal.pone.0048377.t004



**Table 5.** Correlation of the final visual acuity category with the Ocular Trauma Score in 3219 eyes.

| OTS          |            | Final visual acuity category |            |              |              |             | Total       |
|--------------|------------|------------------------------|------------|--------------|--------------|-------------|-------------|
| Raw score    | Category   | NLP                          | LP-4/200   | 5/200–19/100 | 20/100–20/50 | ≥20/40      |             |
| 0–44         | 1          | 135                          | 148        | 63           | 12           | 9           | 367         |
| 45–65        | 2          | 115                          | 429        | 125          | 113          | 90          | 872         |
| 66–80        | 3          | 6                            | 291        | 217          | 311          | 394         | 1219        |
| 81–91        | 4          | 0                            | 13         | 26           | 93           | 239         | 371         |
| 92–100       | 5          | 0                            | 18         | 24           | 21           | 327         | 390         |
| <b>Total</b> | <b>256</b> |                              | <b>899</b> | <b>455</b>   | <b>550</b>   | <b>1059</b> | <b>3219</b> |

(Spearman's correlation coefficient = 0.655,  $P < 0.001$ ).

doi:10.1371/journal.pone.0048377.t005

home-related eye injuries in females most often occurred during 21:00~22:00. Female children aged 14 years or younger represented 73.9% (150/203) of the injuries, reinforcing the need for prevention of childhood injuries within the home and at night. Delayed presentation is also a matter of concern. After injury, 9.5% of patients took longer than 24 hours to seek medical care. Poverty, the absence of decision-makers at home and a lack of awareness among parents can hamper timely management of ocular injuries in our study region. Further studies investigating these barriers are recommended as most of the patients in this study came from poor socioeconomic groups.

### Management

The principal surgical management involved in ocular injuries among our sample suggests that more damage is inflicted to the anterior segment than the posterior segment of the eye (1349 ocular wall repairs, 567 lens extraction, and 85 anterior chamber washouts). The training modules for mid-level eye care personnel and general ophthalmologists in the study region should emphasize the anterior segment of the eye, types of eye injuries, appropriate precautions and first-aid management of the eye. Among the 678 adnexa injuries, 215 were complicated open-globe injuries, 445 were closed-globe injuries and 18 were chemical/thermal burns to the eyeball. The high rate of orbital fracture repair (56/76, 73.7%) in our study demonstrated that ocular trauma was a frequent cause of skull fractures requiring a neurosurgical approach.

### Correlation between Visual Outcome and OTS

In our study, open-globe injuries exhibited poorer visual prognoses than closed-globe injuries. The most common open-globe injuries were anterior penetrating injuries and were associated with good visual prognosis, whereas open injuries that involved the posterior globe often accompanied retinal detachment, severe vitreous hemorrhage or endophthalmitis which are associated with poor prognoses. These findings are consistent with other studies [47,49–51]. We analyzed the OTS distribution in the two types of globe injuries. The results showed that 1000 (49.8%) eyes had open-globe injuries distributed in the lower OTS level (1 to 2). 1177 eyes (74.5%) had closed-globe injuries distributed in the higher OTS level (3 to 5). Higher OTS scores tend to indicate a better prognosis. Good initial vision and a high OTS were statistically correlated with good final vision and remain the most important prognostic factors when counseling patients after injury.

This study had several limitations. First, we were unable to follow the long-term-associated morbidities and outcomes using patient medical records. Second, because a nationwide eye injury surveillance system has not been established, the total number of hospitalized eye injuries may be an underestimate. This study excluded patients who might have suffered minor self-resolving ocular trauma or those who were treated in community primary care facilities, physicians' offices, and the ophthalmology wards of secondary hospitals. Because the above-mentioned medical facilities did not have ophthalmic microsurgical equipment and could not deal with complex medical treatment or perform surgical procedures for ocular trauma, the patients requiring primary care in these hospitals would be referred to one of the three tertiary hospitals in our study. The risk to the local population cannot be accurately determined, which is also a limitation of this study. In addition, there might be some individuals with ocular trauma who had not sought any medical treatment for unknown reasons. We should also consider the loss of many of the minor trauma cases who might have sought care for eye injuries in other hospitals out of this region and of cases of polytraumatized patients. Lastly, there is a geographical bias that is inherent to all ophthalmic trauma study designs. However, these limitations do not significantly affect the major findings of this study. The comprehensive nature and detailed data from each patient's history, clinical presentation and examination findings ensure that the spectrum and distribution of hospitalized ocular traumas in the coastal urban setting are well represented.

In summary, eye injury research and prevention can be further aided by a national collaborative registry of eye injuries in China. A long-term nationwide database of all ophthalmic injuries is recommended.

### Acknowledgments

The authors thank the Joint Shantou International Eye Center, the First Affiliated Hospital of Shantou University and Shantou Center Hospital for providing the medical records of the hospitalized patients.

### Author Contributions

Conceived and designed the experiments: HC LL. Performed the experiments: HC. Analyzed the data: HC LL. Contributed reagents/materials/analysis tools: LL MZ. Wrote the paper: HC LL.

## References

- Augsberger J, Asbury T (2008) Ocular and orbital trauma. In: Riordan-Eva P, Whitcher JP, editors. *General Ophthalmology*, 17th ed. The McGraw-Hill Companies, Inc.
- McGwin G, Owsley C (2005) Incidence of emergency department treated eye injury in the United States. *Arch Ophthalmol* 123: 662–666.
- McGwin G, Aiyuan X, Owsley C (2005) Rate of eye injury in the United States. *Arch Ophthalmol* 123: 970–976.
- Négrel AD, Thylefors B (1998) The global impact of eye injuries. *Ophthalmic Epidemiol* 5(3): 143–169.
- American Academy of Ophthalmology and American Society of Ocular Trauma, Eye Injuries: Recent Data and Trends in the United States Available at: <http://www.aaoo.org/newsroom/guide/upload/Eye-Injuries-BkgnderLongVersFinal-L.pdf>. Accessed 2008 July.
- Mieler W (2001) Overview of ocular trauma. In *Principles and Practice of Ophthalmology* 2nd edition. In Albert D, Jakobiec F, editors. Philadelphia, WB Saunders Co, p 5179.
- Vats S, Murthy GVS, Chandra M, Gupta SK, Vashist P, et al. (2008) Epidemiological study of ocular trauma in an urban slum population in Delhi, India. *Indian J Ophthalmol* 56: 313–316.
- Khattri SK, Lew is AE, Sche OD, Thapa MD, Pradhan EK, et al. (2004) The epidemiology of ocular trauma in rural Nepal. *Br J Ophthalmol* 88: 456–460.
- Tielsch JM, Parver L, Shankar B (1989) Time trends in the incidence of hospitalized ocular trauma. *Arch Ophthalmol* 107: 519–523.
- Raymond SJ, Jenkins M, Favilla I, Rajeswaran D (2010) Hospital-admitted eye injury in Victoria, Australia. *Clinical and Experimental Ophthalmology* 38: 566–571.
- Desai P, MacEwen CJ, Baines P, Minassian DC (1996) Incidence of cases of ocular trauma admitted to hospital and incidence of blinding outcome. *Br J Ophthalmol* 80: 592–596.
- Klopper J, Tielsch JM, Vitale S, See LC, Canner JK (1992) Ocular trauma in the United States: eye injuries resulting in hospitalization, 1984 through 1987. *Arch Ophthalmol* 110: 838–842.
- McGwin G Jr, Hall TA, Xie A, Owsley C (2006) Trends in Eye Injury in the United States, 1992–2001. *Invest Ophthalmol Vis Sci* 47: 521–527.
- Saeed A, Khan I, Dunne O, Stack J, Beatty S (2010) Ocular injury requiring hospitalisation in the South East of Ireland: 2001–2007. *Injury* 41: 87–88.
- Smith ARE, O'Hagan SB, Gole GA (2006) Epidemiology of open- and closed-globe trauma presenting to Cairns Base Hospital, Queensland. *Clin Experiment Ophthalmol* 34: 252.
- Bhogal G, Tomlins PJ, Murray PI (2007) Penetrating ocular injuries in the home. *J Public Health (Oxf)* 29: 72–74.
- Macdonald EC, Cauchi PA, Azuara-Blanco A, Foot B (2009) Surveillance of severe chemical corneal injuries in the UK. *Br J Ophthalmol* 93: 1177–1180.
- Blomdahl S, Norell S (1984) Perforating eye injury in the Stockholm population. *Acta Ophthalmologica* 62: 378–390.
- Mela EK, Dvorak GJ, Mantzouranis GA, Giakoumis AP, Blatsios G, et al. (2005) Ocular trauma in a Greek population: review of 899 cases resulting in hospitalization. *Ophthalmic Epidemiol* 12: 185–190.
- Tomazzoli L, Renzi G, Mansoldo C (2003) Eye injuries in childhood: a retrospective investigation of 88 cases from 1988 to 2000. *Eur J Ophthalmol* 13: 710–713.
- Loon SC, Tay WT, Saw SM, Wang JJ, Wong TY (2009) Prevalence and risk factors of ocular trauma in an urban south-east Asian population: the Singapore Malay Eye Study. *Clin Experiment Ophthalmol* 37: 362–367.
- Woo JH, Sundar G (2006) Eye injuries in Singapore—don't risk it, Do more, A prospective study. *Ann Acad Med Singapore* 35: 706–718.
- Han SB, Yu HG (2010) Visual Outcome After Open Globe Injury and Its Predictive Factors in Korea. *Trauma* 69: 66–72.
- Kim JH, Yang SJ, Kim DS, Kim JG, Yoon YH (2007) Fourteen-year review of open globe injuries in an urban Korean population. *Trauma* 62: 746–749.
- Cillino S, Casuccio A, Di Pace F, Pillitteri F, Cillino G (2008) A five-year retrospective study of the epidemiological characteristics and visual outcomes of patients hospitalized for ocular trauma in a Mediterranean area. *BMC Ophthalmology* 8: 6.
- Jafari AK, Anvari F, Ameri A, Bozorgui S, Shahverdi N (2010) Epidemiology and sociodemographic aspects of ocular traumatic injuries in Iran. *Int Ophthalmol* 30: 691–696.
- Rao LG, Ninan A, Rao KA (2010) Descriptive study on ocular survival, visual outcome and prognostic factors in open globe injuries. *Indian J Ophthalmol* 58: 321–323.
- Shah M, Shah S, Khandekar R (2008) Ocular injuries and visual status before and after their management in the tribal areas of Western India - a historical cohort study. *Graefes Arch Clin Exp Ophthalmol* 246: 191–197.
- Onakpoya OH, Adeoye A, Adeoti CO, Ajite K (2010) Epidemiology of Ocular Trauma Among the Elderly in a Developing Country. *Ophthalmic Epidemiology* 17: 315–320.
- El-Mekawey HE, Abu El Einin KG, Abdelmaboud M, Khafagy A, Eltahawy EM (2011) Epidemiology of ocular emergencies in the Egyptian population: a five-year retrospective study. *Clinical Ophthalmology* 5: 955–960.
- Nordberg E (2000) Injuries as a public health problem in sub-Saharan Africa: Epidemiology and prospects for control. *East Afr Med J* 77: 41–43.
- Kuhn F, Morris R, Witherspoon CD, Heimann K, Jeffers JB, et al. (1996) A standardized classification of ocular trauma. *Ophthalmology* 103: 240–243.
- Kuhn F, Morris R, Witherspoon CD, Mester V (2004) The Birmingham Eye Trauma Terminology system (BETT). *J Fr Optalmol* 27: 206–210.
- Kuhn F, Maisiak R, Mann L, Mester V, Morris R, et al. (2002) The ocular trauma score (OTS). *Ophthalmol Clin N Am* 15: 163–165.
- Owens PL, Mutter R (2011) Emergency Department Visits Related to Eye Injuries, 2008. In: Rockville, editor. Maryland. Healthcare Cost and Utilization Project (HCUP) Statistical Briefs. Agency for Healthcare Research (US), 2006 Feb.
- Chua D, Wong W, Lamoureux EL, Aung T, Saw SM, et al. (2011) The prevalence and risk factors of ocular trauma: the Singapore Indian eye study. *Ophthalmic Epidemiol* 18(6): 281–287.
- Ojabo CO, Adeniyi OS, Ogli SA (2011) Farm-related ocular trauma in Makurdi, Nigeria. *Niger J Med* 20: 114–119.
- Pandita A, Merriman M (2012) Ocular trauma epidemiology: 10-year retrospective study. *N Z Med J* 125: 61–69.
- McCarty CA, Fu CL, Taylor HR (2006) Epidemiology of ocular trauma in Australia. *Ophthalmology* 106: 1847–1852.
- Maneschg OA, Resch M, Papp A, Németh J (2011) Prognostic factors and visual outcome for open globe injuries with intraocular foreign bodies. *Klin Monbl Augenheilkd* 228: 801–807.
- Rofail M, Lee GA, O'Rourke P (2006) Prognostic indicators for open globe injury. *Clin Experiment Ophthalmol* 34: 783–786.
- Smith AR, O'Hagan SB, Gole GA (2006) Epidemiology of open and closed-globe trauma Presenting to Cairns Base Hospital, Queensland. *Clin Experiment Ophthalmol* 34: 252–259.
- Chang CH, Chen CL, Ho CK, Lai YH, Hu RC, et al. (2008) Hospitalized eye injury in a large industrial city of South-Eastern Asia. *Graefes Arch Clin Exp Ophthalmol* 246: 223–228.
- Brophy M, Sinclair SA, Hostetler SG, Xiang H (2006) Pediatric eye injury-related hospitalizations in the United States. *Pediatrics* 117: 1263–1271.
- Altıntaş L, Altıntaş O, Yüksel N, Pirhan D, Ozkan B, et al. (2011) Pattern of open eye injuries in northwest Turkey: a retrospective study. *Ulus Travma Acil Cerrahi Derg* 17: 334–339.
- Mahmoud M Soliman, Tamer A Macky (2008) Pattern of ocular trauma in Egypt. *Graefes Arch Clin Exp Ophthalmol* 246: 205–212.
- Kanoff JM, Turalba AV, Andreoli MT, Andreoli CM (2010) Characteristics and Outcomes of Work-Related Open Globe Injuries. *Am J Ophthalmol* 150: 265–269.
- Blackburn J, Levitan EB, MacLennan PA, Owsley C, McGwin G Jr (2012) A case-crossover study of risk factors for occupational eye injuries. *J Occup Environ Med* 54: 42–47.
- Hossain MM, Mohiuddin AA, Akhanda AH, Hossain MI, Islam MF, et al. (2011) Pattern of ocular trauma. *Mymensingh Med J* 20: 377–380.
- Mansouri M, Faghghi H, Hajizadeh F, Rasoulinejad SA, Rajabi MT, et al. (2009) Epidemiology of open-globe injuries in Iran: analysis of 2,340 cases in 5 years (report no.1). *Retina* 29: 114–119.
- Soylu M, Sizmaz S, Cayli S (2010) Eye injury (ocular trauma) in southern Turkey: epidemiology, ocular survival, and visual outcome. *Int Ophthalmol* 30: 143–148.
